# Supplementary material for: Ectopic Spacer Acquisition in Streptococcus thermophilus CRISPR3 Array
Source: PubMed Central journal article supplement (PMC7999890; doi:10.3390/microorganisms9030512), 2021-03-01
Supplement: microorganisms-09-00512-s001.pdf [file microorganisms-09-00512-s001.pdf]

**Table S1.** Nucleotide sequences and positions of newly acquired spacers in CRISPR3 of all the BIMs obtained after a challenge with the virulent *cos*-type phage 53.

| BIM*    | Sequence of new spacer (5'-3')                                   | Position in CRISPR3 | Protospacer position in phage 53 genome | PAM NGGNG     |
|---------|------------------------------------------------------------------|---------------------|-----------------------------------------|---------------|
| BIM1    | TGATAGTAAAATATTGTCATCATTGAATAC<br>CATTACAGACACAGGAGAAGGCGGCTATTA | None<br>4           | None<br>22837-22866, <i>orf22</i>       | None<br>TGGTG |
| BIM2    | TTATGCAAACGGTGGCCTAGTCCACAAGAA                                   | 4                   | 14360-14389, <i>orf14</i>               | CGGCG         |
| BIM3    | AGTTGATGGTAAAACGGTGAATGACCATA                                    | 4                   | 31076-31105, <i>orf35</i>               | TGGCG         |
| BIM4-1  | AAACGTCAAAAAAGCTGGTAGTAAGGTCAA                                   | 4                   | 11789-11818, <i>orf14</i>               | TGGCG         |
| BIM4-2  | AAACGTCAAAAAAGCTGGTAGTAAGGTCAA                                   | 4                   | 11789-11818, <i>orf14</i>               | TGGCG         |
| BIM5-1  | TGTTTCAGTATCGTTCGACTTCATTCCCCAAA                                 | 4                   | 10537-10508, <i>orf14</i>               | CGGCG         |
| BIM5-2  | TTGTTTCAGTATCGTTCGACTTCATTCCCCAAA                                | 4                   | 10538-10508, <i>orf14</i>               | CGGCG         |
| BIM6    | TGTTTCAGTATCGTTCGACTTCATTCCCCAAA                                 | 4                   | 10537-10508, <i>orf14</i>               | CGGCG         |
| BIM7    | TCATTTCGATCAGCTATATGGATGATGTAA                                   | 9                   | 1880-1909, <i>orf2</i>                  | AGGAG         |
| BIM8    | TGAAGAAATTACGCTTAATATTGCTTCAAAA                                  | 9                   | 5263-5292, <i>orf6</i>                  | CGGCG         |
| BIM9-1  | GAAGGCTCAAGAAAGTCAGATGCGAAGCGC                                   | 9                   | 9884-9913, <i>orf14</i>                 | TGGCG         |
| BIM9-2  | GAAGGCTCAAGAAAGTCAGATGCGAAGCGC                                   | 9                   | 9884-9913, <i>orf14</i>                 | TGGCG         |
| BIM10   | TCGTGGAGAAGACGCAGTAAATAATAAACT                                   | 9                   | 11846-11875, <i>orf14</i>               | TGGTG         |
| BIM11-1 | CTACCGCTTCAAAGATAAAGCGAAAGACTC                                   | 9                   | 13499-13528, <i>orf14</i>               | TGGAG         |
| BIM11-2 | CTACCGCTTCAAAGATAAAGCGAAAGACTC                                   | 9                   | 13499-13528, <i>orf14</i>               | TGGAG         |
| BIM11-3 | CTACCGCTTCAAAGATAAAGCGAAAGACTC                                   | 9                   | 13499-13528, <i>orf14</i>               | TGGAG         |
| BIM12   | TACTTATGATGGTGAAGATTACAACATAAA                                   | 9                   | 13769-13789, <i>orf14</i>               | CGGTG         |
| BIM13   | TAAGATTTTGGCGACTATACAGAAGGAATC                                   | 9                   | 14108-14137, <i>orf14</i>               | AGGCG         |
| BIM14-1 | CTCATATTCGTTTGTGGCTTTTGTAAATAAA                                  | 9                   | 14708-14679, <i>orf14</i>               | TGGTG         |
| BIM14-2 | CTCATATTCGTTTGTGGCTTTTGTAAATAAA                                  | 9                   | 14708-14679, <i>orf14</i>               | TGGTG         |
| BIM15-1 | TAAACGATACTTGAATCTGTTTAACTGATA                                   | 9                   | 14942-14913, <i>orf15</i>               | AGGTG         |
| BIM15-2 | TAAACGATACTTGAATCTGTTTAACTGATA                                   | 9                   | 14942-14913, <i>orf15</i>               | AGGTG         |
| BIM16-1 | ATGCGGTTTGATGATGTTCGTTTCAGTACTAC                                 | 9                   | 15896-15925, <i>orf15</i>               | TGGTG         |
| BIM16-2 | ATGCGGTTTGATGATGTTCGTTTCAGTACTAC                                 | 9                   | 15896-15925, <i>orf15</i>               | TGGTG         |
| BIM16-3 | ATGCGGTTTGATGATGTTCGTTTCAGTACTAC                                 | 9                   | 15896-15925, <i>orf15</i>               | TGGTG         |
| BIM17-1 | TTTCAACGCTGGTAATTTTCATTGGACAAGA                                  | 9                   | 16983-17012, <i>orf16</i>               | TGGCG         |
| BIM17-2 | TTTCAACGCTGGTAATTTTCATTGGACAAGA                                  | 9                   | 16983-17012, <i>orf16</i>               | TGGCG         |
| BIM18-1 | GAAGACAGCACAAACCCAGCAGATTATACA                                   | 9                   | 17899-17928, <i>orf16</i>               | TGGAG         |
| BIM18-2 | GAAGACAGCACAAACCCAGCAGATTATACA                                   | 9                   | 17899-17928, <i>orf16</i>               | TGGAG         |
| BIM18-3 | GAAGACAGCACAAACCCAGCAGATTATACA                                   | 9                   | 17899-17928, <i>orf16</i>               | TGGAG         |
| BIM19-1 | TTTATCTTTTTTCAGCGCAGTTTAAACGGGTC                                 | 9                   | 19167-19196, <i>orf17</i>               | TGGTG         |
| BIM19-2 | TTTATCTTTTTTCAGCGCAGTTTAAACGGGTC                                 | 9                   | 19167-19196, <i>orf17</i>               | TGGTG         |
| BIM19-3 | TTTATCTTTTTTCAGCGCAGTTTAAACGGGTC                                 | 9                   | 19167-19196, <i>orf17</i>               | TGGTG         |
| BIM20-1 | TGAGCAGGTAGTCAATACATTCAAAAAGAAA                                  | 9                   | 26313-26342, <i>orf31</i>               | TGGCG         |
| BIM20-2 | TGAGCAGGTAGTCAATACATTCAAAAAGAAA                                  | 9                   | 26313-26342, <i>orf31</i>               | TGGCG         |
| BIM21-1 | TACATTCTTTGTTCATTGACGTGGACATGCA                                  | 9                   | 28097-28126, <i>orf33</i>               | TGGCG         |
| BIM21-2 | TACATTCTTTGTTCATTGACGTGGACATGCA                                  | 9                   | 28097-28126, <i>orf33</i>               | TGGCG         |
| BIM21-3 | TACATTCTTTGTTCATTGACGTGGACATGCA                                  | 9                   | 28097-28126, <i>orf33</i>               | TGGCG         |
| BIM22-1 | CCACACCCTCCGAATGTCTTTTTTCAGTCAT                                  | 9                   | 28058-28029, <i>orf35</i>               | TGGTG         |
| BIM22-2 | CCACACCCTCCGAATGTCTTTTTTCAGTCAT                                  | 9                   | 28058-28029, <i>orf35</i>               | TGGTG         |
| BIM23   | AAGAGGTGCTTCTGTTATGCTTCCATCTTT                                   | 9                   | 28406-28377, <i>orf33</i>               | TGGCG         |
| BIM24   | TCAGAATGGCTGATGGACGTTGGTTTGATAC                                  | 9                   | 30865-30895, <i>orf35</i>               | TGGAG         |
| BIM25-1 | AGTTGATGGTAAAACGGTGAATGACCATA                                    | 9                   | 31076-31105, <i>orf35</i>               | TGGCG         |

---

|         |                                 |   |                           |       |
|---------|---------------------------------|---|---------------------------|-------|
| BIM25-2 | AGTTGATGGTAAAACGGTGGGAATGACCATA | 9 | 31076-31105, <i>orf35</i> | TGGCG |
| BIM25-3 | AGTTGATGGTAAAACGGTGGGAATGACCATA | 9 | 31076-31105, <i>orf35</i> | TGGCG |
| BIM25-4 | AGTTGATGGTAAAACGGTGGGAATGACCATA | 9 | 31076-31105, <i>orf35</i> | TGGCG |

---

\*Different BIMs that went through the same acquisition and deletion events were considered the same, therefore named with the same number followed by a hyphen and the replica number. Of note, spacers sequences from BIMs 5-1 and 5-2 differ in one nucleotide. BIM3 and BIMs 25, and BIM5-1 and BIM6 share the same spacer sequence but went through different acquisition and deletion events so were considered different.
